# Supplementary material for: A DOCK8-WIP-WASp complex links T cell receptors to the actin cytoskeleton
Source: JCI journal article supplement (doi:10.1172/jci85774), 2016-09-05
Supplement: sd1 [file 1]

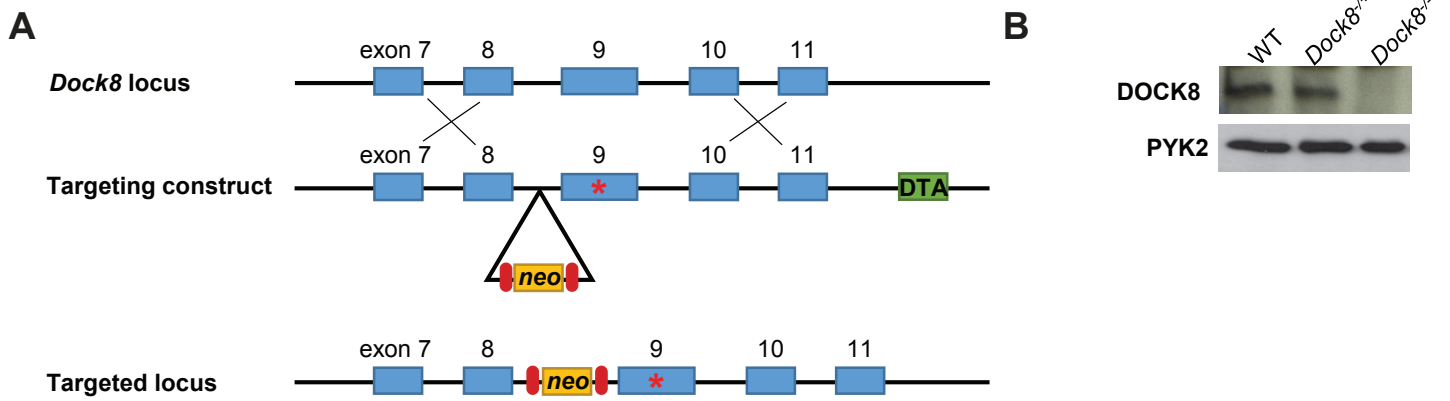

**Figure S1. Strategy for the generation of *Dock8*<sup>-/-</sup> mice** **A.** Schematic of the targeted locus and targeting vector used to generate *Dock8*<sup>-/-</sup> mice. The asterisk denotes the introduced stop codon. Small red boxes indicate Flp sequences flanking the *neo* gene. The green box represents the Diphtheria Toxin A gene. **B.** DOCK8 protein expression from splenocytes of WT, *Dock8*<sup>+/+</sup> and *Dock8*<sup>-/-</sup> mice with immunoblotting for PYK2 as a loading control.
